# Supplementary material
Source: PubMed Central journal article supplement (PMC3062932)
Supplement: tx100323m_si_001.pdf [file tx100323m_si_001.pdf]

## Supporting Information

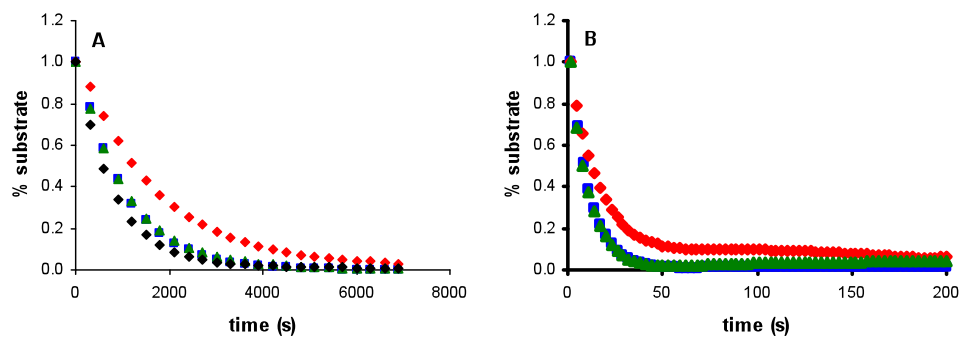

Figure S1. Reaction of HNE, ONE and their analogs with NAC. A) ■ HNE, ◆ COOH-HNE, ▲ COOM-HNE, ◆ ONEA; B) ■ ONE, ◆ COOH-ONE, ▲ COOM-ONE. Reactions were carried out with 0.056 mM electrophile and 1 mM NAC in phosphate buffer (50 mM, pH 7.4) at 37 °C. The consumption of electrophile was monitored by UV absorbance at 225 and 230 nm for HNE and ONE, respectively.

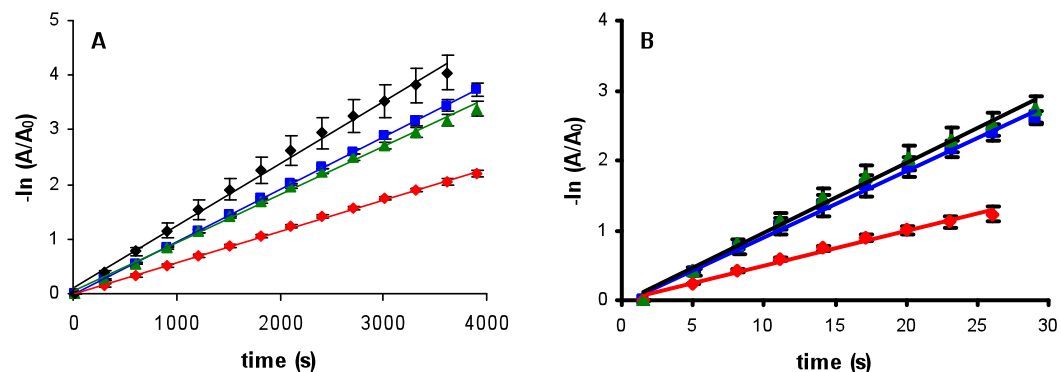

Figure S2. First order plots for HNE, ONE and their analogs at 1 mM NAC (n = 4). A) ■ HNE, ◆ COOH-HNE, ▲ COOM-HNE, ◆ ONEA; B) ■ ONE, ◆ COOH-ONE, ▲ COOM-ONE.

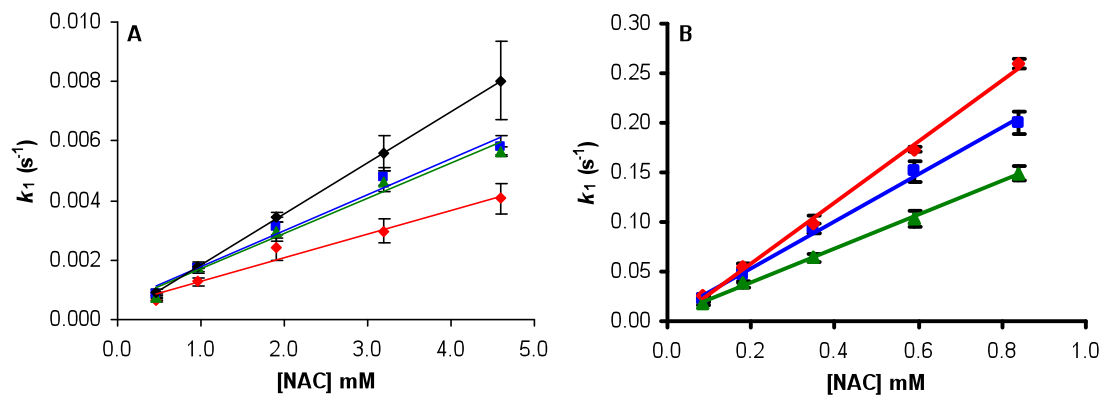

Figure S3. Second order plots for HNE, ONE and their analogs ( $n = 3$ ). A) ■ HNE, ◆ COOH-HNE, ▲ COOM-HNE, ◆ ONEA; B) ■ ONE, ◆ COOH-ONE, ▲ COOM-ONE.
